# Supplementary material for: Synthesis of an amantadine-based novel Schiff base and its transition metal complexes as potential ALP, α-amylase, and α-glucosidase inhibitors
Source: Royal Society of Chemistry journal article supplement (doi:10.1039/d2ra07051k), 2023-01-01
Supplement: d2ra07051k1.pdf [file d2ra07051k1.pdf]

## Synthesis of amantadine-based novel Schiff base and its transition metal complexes as potential ALP, $\alpha$ -amylase, and $\alpha$ -glucosidase inhibitors

Aliya Ajaz<sup>a</sup>, Muhammad Ashraf Shaheen<sup>a\*</sup>, Maqsood Ahmed<sup>b</sup>, Khurram Shahzad Munawar<sup>a,c</sup>, Abu Bakar Siddique<sup>a</sup>, Abdul Karim<sup>a</sup>, Nazir Ahmad<sup>d</sup>, Muhammad Fayyaz ur Rehman<sup>a\*</sup>

<sup>a</sup>Institute of Chemistry, University of Sargodha, 40100; [aliyarajput2822@gmail.com](mailto:aliyarajput2822@gmail.com) (AA);

[ashraf.shaheen@uos.edu.pk](mailto:ashraf.shaheen@uos.edu.pk) (MAS); [fayaz9@gmail.com](mailto:fayaz9@gmail.com) (FUR), [abubakar.siddique@uos.edu.pk](mailto:abubakar.siddique@uos.edu.pk) (ABS),

[abdul.karim@uos.edu.pk](mailto:abdul.karim@uos.edu.pk) (AK)

<sup>b</sup>Materials Chemistry Laboratory, Institute of Chemistry, The Islamia University of Bahawalpur, Baghdad-ul-Jadeed Campus 63100, Pakistan; [maqsood.ahmed@iub.edu.pk](mailto:maqsood.ahmed@iub.edu.pk)

<sup>c</sup>Department of Chemistry, University of Mianwali, Mianwali, 42200 Pakistan [khurramchemist@gmail.com](mailto:khurramchemist@gmail.com)

<sup>d</sup>Department of Chemistry Government College University, Lahore 54000, Pakistan; [dr.nazirahmad@gcu.edu.pk](mailto:dr.nazirahmad@gcu.edu.pk)

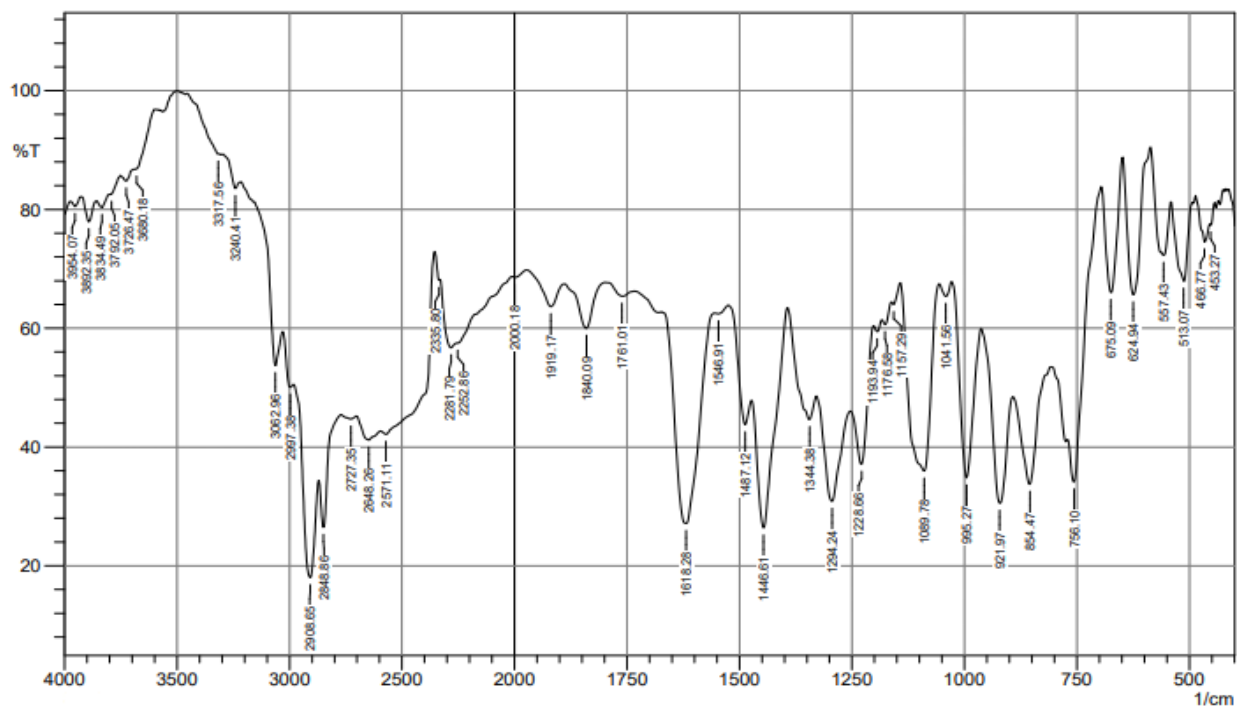

Figure S1. FT-IR spectrum of (E)-2-((adamantan-1-ylimino)methyl)-6-allylphenol (HL)

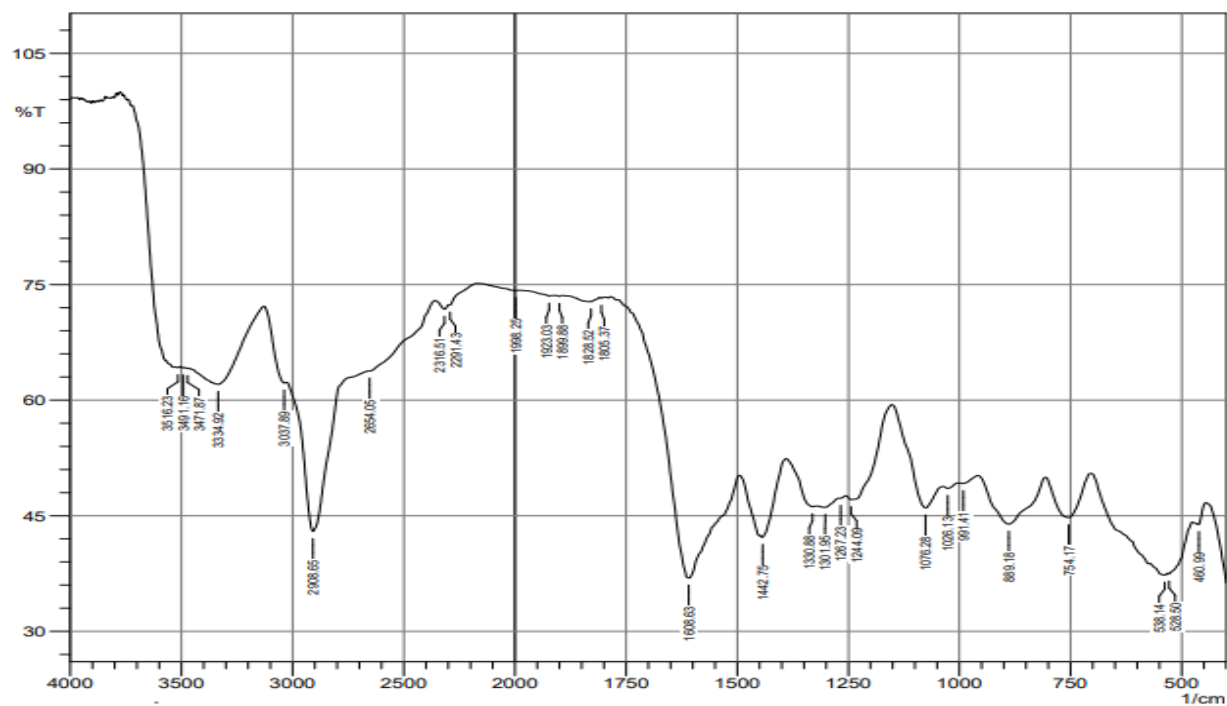

Figure S2. FT-IR spectrum of Cr(III) complex

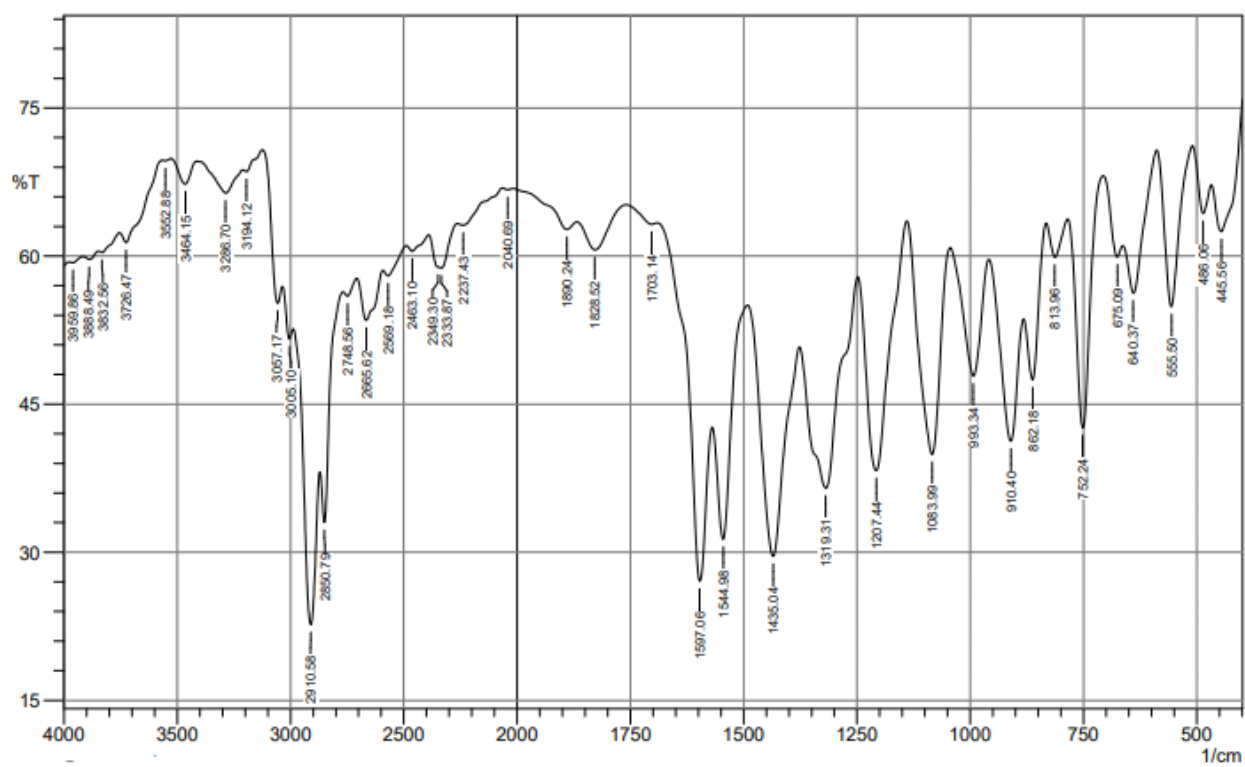

Figure S3. FT-IR spectrum of Co(II) complex

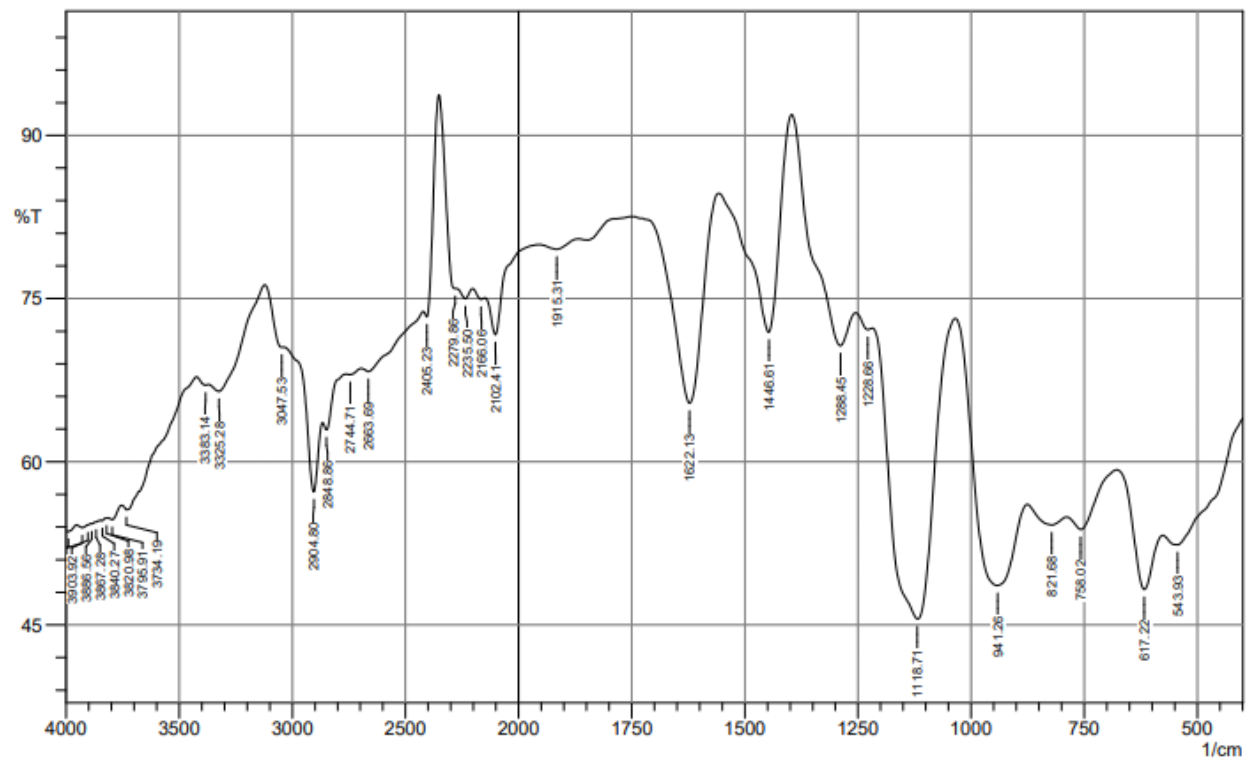

Figure S4. FT-IR spectrum of VO(IV) complex

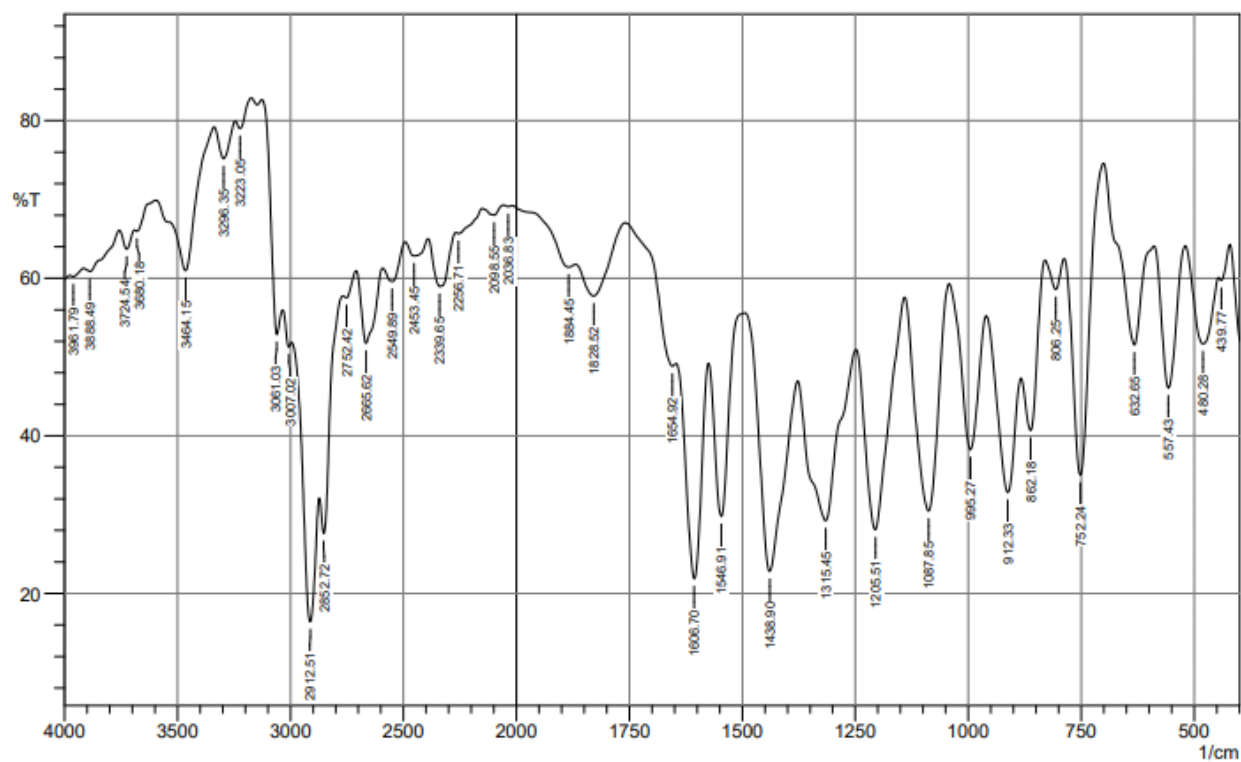

Figure S5. FT-IR spectrum of Zn(II) complex

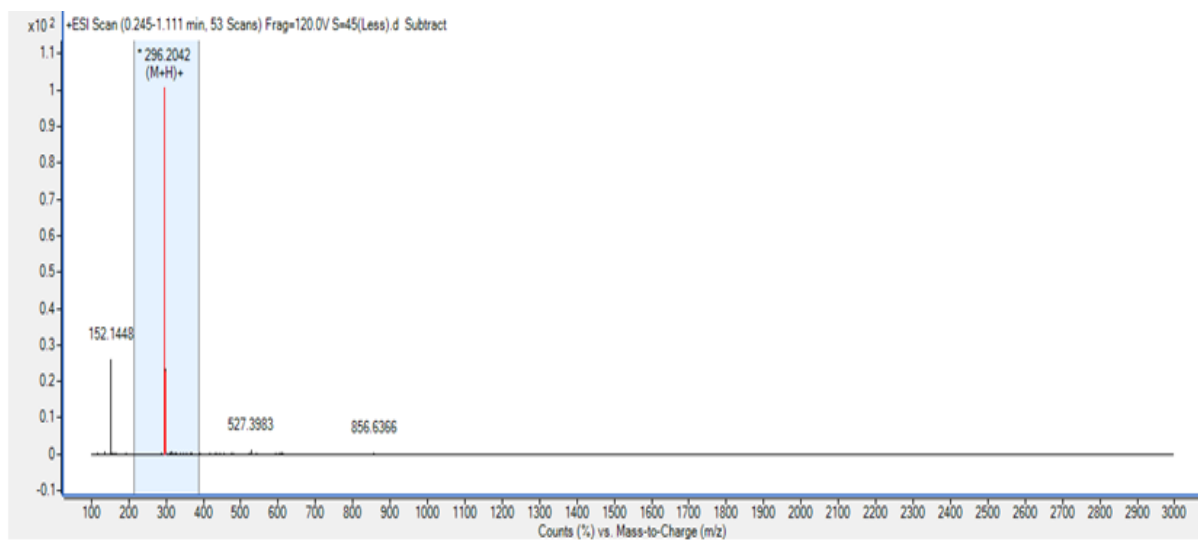

Figure S6. Mass spectrum of (E)-2-((adamantan-1-ylimino)methyl)-6-allylphenol

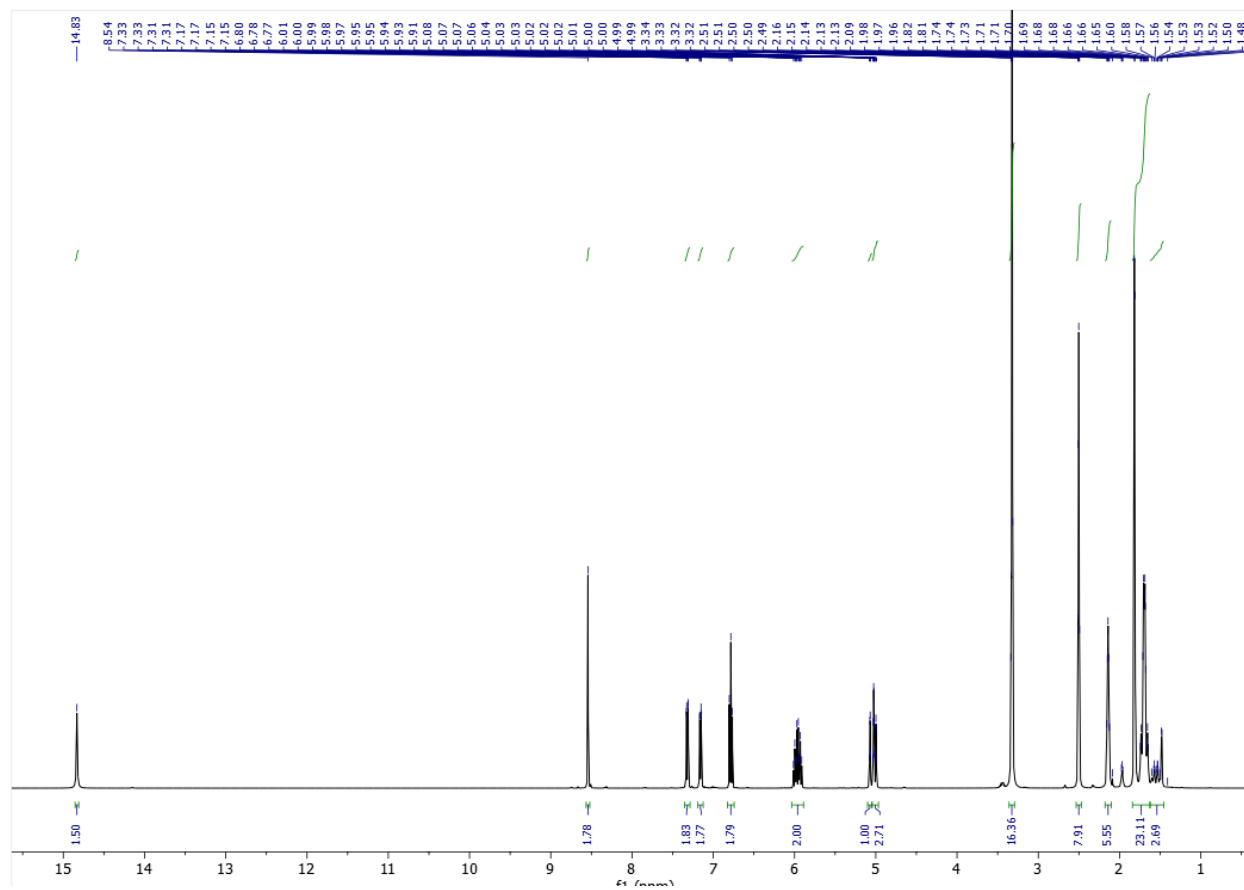

Figure S7. <sup>1</sup>H-NMR spectrum of (E)-2-((adamantan-1-ylimino)methyl)-6-allylphenol

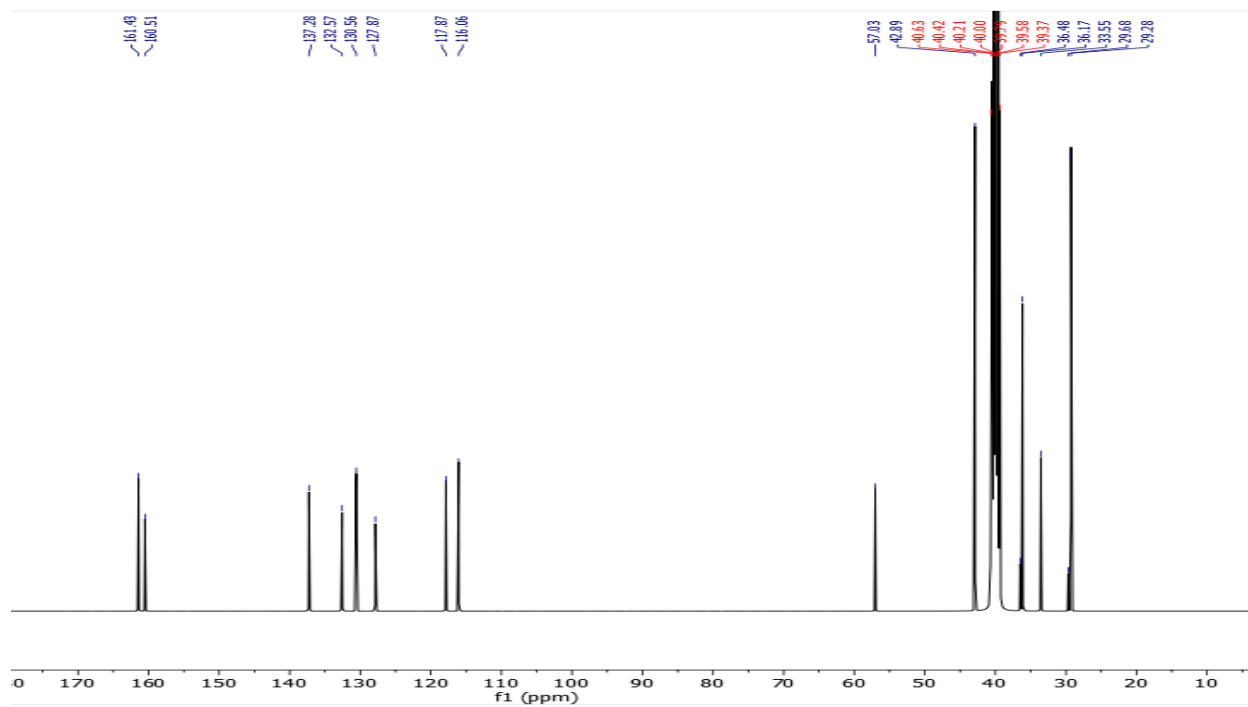

**Figure S8.**  $^{13}\text{C}$ -NMR spectrum of (E)-2-((adamantan-1-ylimino)methyl)-6-allylphenol

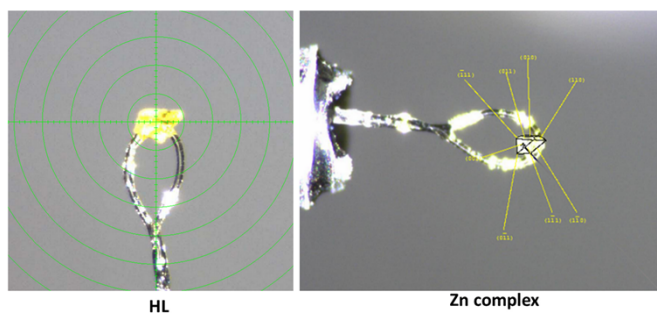

**Figure S9.** Single crystals of HL (left) and Zn complex (right) used for the collection of X-ray diffraction data

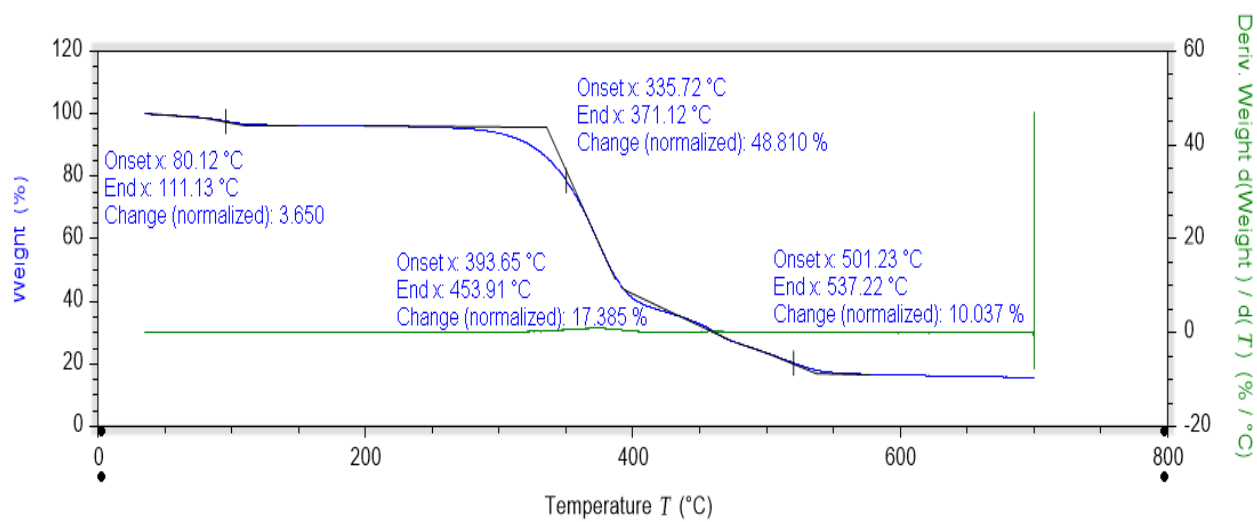

**Figure S10. Thermogram of Zinc(II) complex**

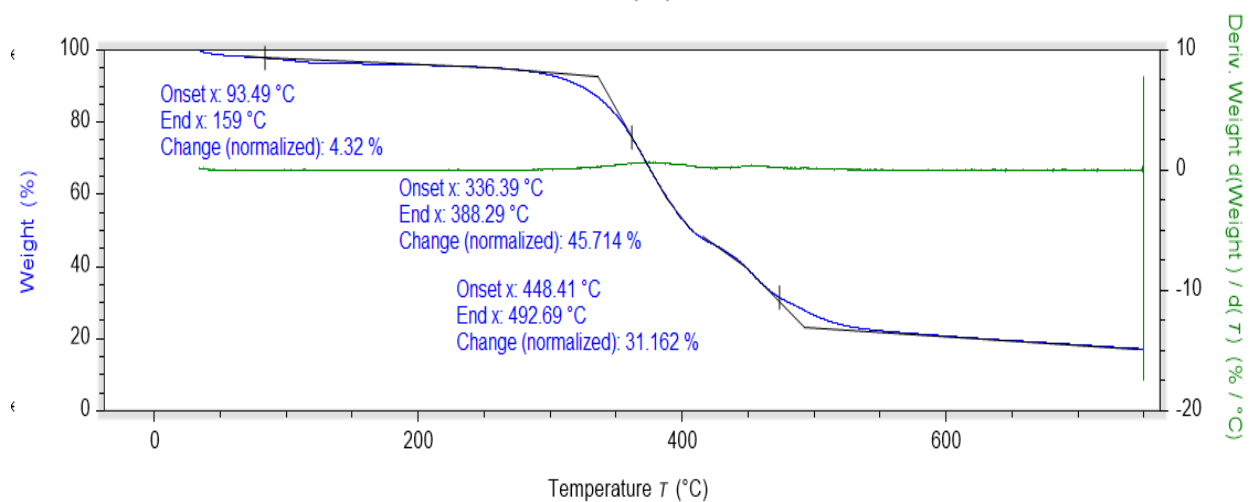

**Figure S11. Thermogram of cobalt(II) complex**

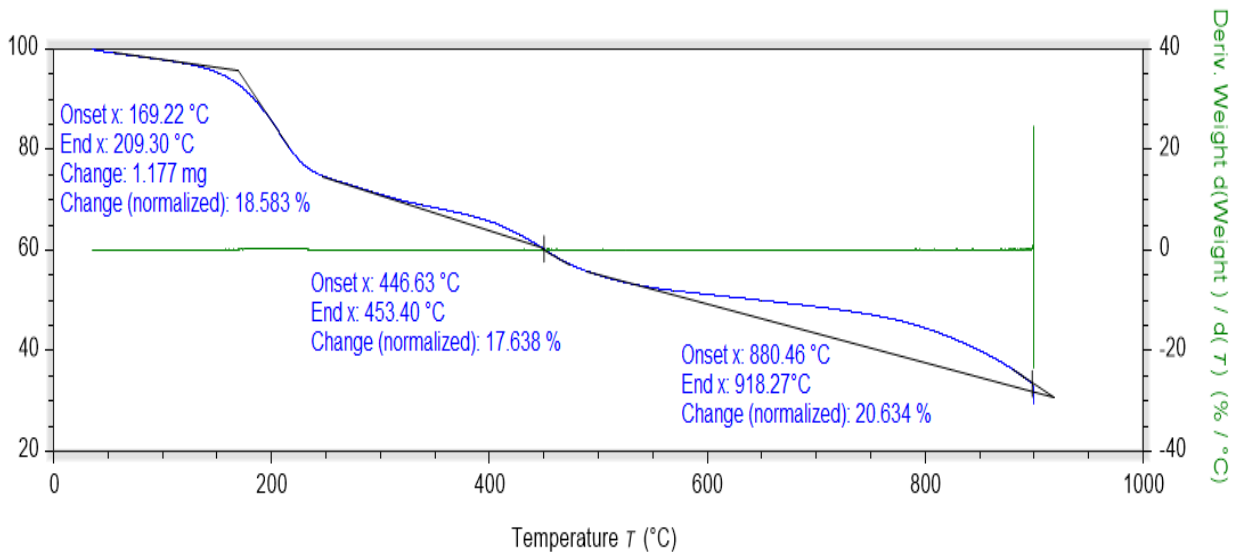

**Figure S12. Thermogram of chromium(III) complex**

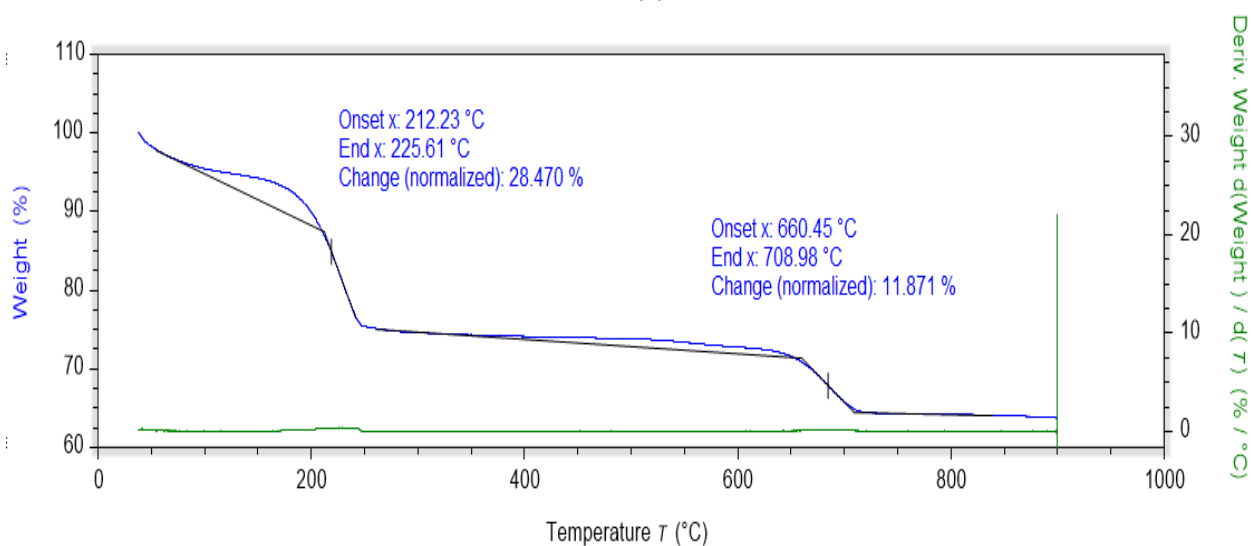

**Figure S13. Thermogram of Oxovanadium(IV) complex**

**Table S1. Experimental details**

| <b>Crystal data</b>                                                                                              |                                                                        |                                                                                   |
|------------------------------------------------------------------------------------------------------------------|------------------------------------------------------------------------|-----------------------------------------------------------------------------------|
| Chemical formula                                                                                                 | C <sub>20</sub> H <sub>25</sub> NO                                     | C <sub>40</sub> H <sub>48</sub> N <sub>2</sub> O <sub>2</sub> Zn·H <sub>2</sub> O |
| CCDC Number                                                                                                      | 2231982                                                                | 2231983                                                                           |
| <i>M<sub>r</sub></i>                                                                                             | 295.41                                                                 | 672.19                                                                            |
| Crystal system, space group                                                                                      | Monoclinic, <i>Pc</i>                                                  | Monoclinic, <i>P2<sub>1</sub>/c</i>                                               |
| Temperature (K)                                                                                                  | 100 (1)                                                                |                                                                                   |
| <i>a</i> , <i>b</i> , <i>c</i> (Å)                                                                               | 7.0706 (15), 18.748 (4), 12.612 (3)                                    | 23.960 (11), 10.415 (5), 13.692 (7)                                               |
| θ (°)                                                                                                            | 105.578 (5)                                                            | 95.301 (13)                                                                       |
| <i>V</i> (Å <sup>3</sup> )                                                                                       | 1610.4 (6)                                                             | 3402 (3)                                                                          |
| <i>Z</i>                                                                                                         | 4                                                                      | 4                                                                                 |
| Radiation type                                                                                                   | Microfocus Mo <i>K</i> α                                               |                                                                                   |
| μ (mm <sup>-1</sup> )                                                                                            | 0.07                                                                   | 0.76                                                                              |
| Crystal size (mm)                                                                                                | 0.25 × 0.19 × 0.15                                                     | 0.15 × 0.09 × 0.06                                                                |
| Crystal Color                                                                                                    | Yellow                                                                 | Colorless                                                                         |
| <b>Data collection</b>                                                                                           |                                                                        |                                                                                   |
| Diffractometer                                                                                                   | Bruker D8 Venture PHOTON II detector (Bruker, 2016)                    |                                                                                   |
| Absorption correction                                                                                            | Multiscan (SADABS, Bruker 2016)                                        | Analytical (SADABS, Bruker 2016)                                                  |
| No. of measured, independent and observed [ <i>I</i> > 2σ( <i>I</i> )] reflections                               | 33731, 6004, 2414                                                      | 68222, 6248, 3498                                                                 |
| <i>R</i> <sub>int</sub>                                                                                          | 0.162                                                                  | 0.151                                                                             |
| (sin θ/λ <sub>max</sub> (Å <sup>-1</sup> ))                                                                      | 0.618                                                                  | 0.603                                                                             |
| <b>Refinement</b>                                                                                                |                                                                        |                                                                                   |
| <i>R</i> [ <i>F</i> <sup>2</sup> > 2 σ ( <i>F</i> <sup>2</sup> )], <i>wR</i> ( <i>F</i> <sup>2</sup> ), <i>S</i> | 0.143, 0.435, 1.25                                                     | 0.067, 0.238, 1.10                                                                |
| No. of reflections                                                                                               | 6004                                                                   | 6248                                                                              |
| No. of parameters                                                                                                | 405                                                                    | 436                                                                               |
| H-atom treatment                                                                                                 | H atoms treated by a mixture of independent and constrained refinement |                                                                                   |
| Δρ <sub>max</sub> , Δρ <sub>min</sub> (e Å <sup>-3</sup> )                                                       | 0.72, -0.51                                                            | 0.94, -0.93                                                                       |

**Table S2. Bond distances and angles for Ligand (HL)**

|         |            |          |            |
|---------|------------|----------|------------|
| O1—C9   | 1.351 (16) | C3—H3A   | 0.9900     |
| O2—C29  | 1.333 (15) | C3—H3B   | 0.9900     |
| N1—C10  | 1.254 (16) | C3—C2    | 1.49 (2)   |
| N1—C11  | 1.456 (16) | C19—H19A | 0.9900     |
| N2—C30  | 1.275 (17) | C19—H19B | 0.9900     |
| N2—C31  | 1.483 (17) | C34—H34A | 0.9900     |
| C29—C28 | 1.414 (18) | C34—H34B | 0.9900     |
| C29—C24 | 1.429 (18) | C34—C38  | 1.53 (2)   |
| C4—C9   | 1.401 (17) | C34—C32  | 1.517 (19) |



|          |            |          |            |
|----------|------------|----------|------------|
| C4—C5    | 1.389 (19) | C26—H26  | 0.9500     |
| C4—C3    | 1.521 (19) | C26—C27  | 1.356 (19) |
| C9—C8    | 1.39 (2)   | C2—H2    | 0.9500     |
| C8—C10   | 1.468 (19) | C2—C1    | 1.27 (2)   |
| C8—C7    | 1.40 (2)   | C37—H37A | 0.9900     |
| C20—H20A | 0.9900     | C37—H37B | 0.9900     |
| C20—H20B | 0.9900     | C37—C38  | 1.534 (19) |
| C20—C18  | 1.507 (17) | C37—C36  | 1.50 (2)   |
| C20—C11  | 1.520 (19) | C27—H27  | 0.9500     |
| C15—H15A | 0.9900     | C33—H33A | 0.9900     |
| C15—H15B | 0.9900     | C33—H33B | 0.9900     |
| C15—C13  | 1.50 (2)   | C33—C32  | 1.49 (2)   |
| C15—C18  | 1.53 (2)   | C33—C36  | 1.52 (2)   |
| C10—H10  | 0.9500     | C30—H30  | 0.9500     |
| C28—C27  | 1.37 (2)   | C31—C35  | 1.51 (2)   |
| C28—C30  | 1.470 (18) | C31—C39  | 1.520 (19) |
| C13—H13  | 1.0000     | C31—C40  | 1.529 (18) |
| C13—C12  | 1.489 (18) | C14—H14A | 0.9900     |
| C13—C14  | 1.519 (19) | C14—H14B | 0.9900     |
| C17—H17A | 0.9900     | C35—H35A | 0.9900     |
| C17—H17B | 0.9900     | C35—H35B | 0.9900     |
| C17—C18  | 1.53 (2)   | C35—C36  | 1.54 (2)   |
| C17—C16  | 1.52 (2)   | C23—H23A | 0.9900     |
| C6—H6    | 0.9500     | C23—H23B | 0.9900     |
| C6—C5    | 1.39 (2)   | C23—C22  | 1.48 (2)   |
| C6—C7    | 1.418 (19) | C38—H38  | 1.0000     |
| C18—H18  | 1.0000     | C38—C39  | 1.507 (18) |
| C24—C25  | 1.353 (19) | C39—H39A | 0.9900     |
| C24—C23  | 1.537 (19) | C39—H39B | 0.9900     |
| C5—H5    | 0.9500     | C32—H32  | 1.0000     |
| C16—H16  | 1.0000     | C32—C40  | 1.48 (2)   |
| C16—C19  | 1.529 (19) | C40—H40A | 0.9900     |
| C16—C14  | 1.54 (2)   | C40—H40B | 0.9900     |
| C25—H25  | 0.9500     | C36—H36  | 1.0000     |
| C25—C26  | 1.43 (2)   | C22—H22  | 0.9500     |
| C12—H12A | 0.9900     | C22—C21  | 1.28 (2)   |
| C12—H12B | 0.9900     | C1—H1A   | 0.9500     |
| C12—C11  | 1.566 (19) | C1—H1B   | 0.9500     |

|                    |            |               |            |
|--------------------|------------|---------------|------------|
| C7—H7              | 0.9500     | C21—H21A      | 0.9500     |
| C11—C19            | 1.517 (19) | C21—H21B      | 0.9500     |
| <b>Bond angles</b> |            |               |            |
| C10—N1—C11         | 122.4 (12) | H19A—C19—H19B | 107.9      |
| C30—N2—C31         | 121.3 (11) | H34A—C34—H34B | 108.2      |
| O2—C29—C28         | 123.6 (12) | C38—C34—H34A  | 109.8      |
| O2—C29—C24         | 118.1 (11) | C38—C34—H34B  | 109.8      |
| C28—C29—C24        | 118.4 (12) | C32—C34—H34A  | 109.8      |
| C9—C4—C3           | 120.2 (12) | C32—C34—H34B  | 109.8      |
| C5—C4—C9           | 117.9 (13) | C32—C34—C38   | 109.5 (11) |
| C5—C4—C3           | 121.8 (12) | C25—C26—H26   | 120.8      |
| O1—C9—C4           | 118.3 (12) | C27—C26—C25   | 118.4 (14) |
| O1—C9—C8           | 121.1 (12) | C27—C26—H26   | 120.8      |
| C8—C9—C4           | 120.5 (13) | C3—C2—H2      | 115.7      |
| C9—C8—C10          | 121.7 (12) | C1—C2—C3      | 128.7 (19) |
| C9—C8—C7           | 121.0 (13) | C1—C2—H2      | 115.7      |
| C7—C8—C10          | 117.3 (14) | H37A—C37—H37B | 108.3      |
| H20A—C20—H20B      | 108.1      | C38—C37—H37A  | 109.8      |
| C18—C20—H20A       | 109.5      | C38—C37—H37B  | 109.8      |
| C18—C20—H20B       | 109.5      | C36—C37—H37A  | 109.8      |
| C18—C20—C11        | 110.5 (11) | C36—C37—H37B  | 109.8      |
| C11—C20—H20A       | 109.5      | C36—C37—C38   | 109.2 (12) |
| C11—C20—H20B       | 109.5      | C28—C27—H27   | 119.0      |
| H15A—C15—H15B      | 108.3      | C26—C27—C28   | 122.0 (14) |
| C13—C15—H15A       | 109.9      | C26—C27—H27   | 119.0      |
| C13—C15—H15B       | 109.9      | H33A—C33—H33B | 108.1      |
| C13—C15—C18        | 108.8 (12) | C32—C33—H33A  | 109.5      |
| C18—C15—H15A       | 109.9      | C32—C33—H33B  | 109.5      |
| C18—C15—H15B       | 109.9      | C32—C33—C36   | 110.7 (13) |
| N1—C10—C8          | 121.7 (13) | C36—C33—H33A  | 109.5      |
| N1—C10—H10         | 119.1      | C36—C33—H33B  | 109.5      |
| C8—C10—H10         | 119.1      | N2—C30—C28    | 122.5 (13) |
| C29—C28—C30        | 119.7 (13) | N2—C30—H30    | 118.7      |
| C27—C28—C29        | 120.2 (12) | C28—C30—H30   | 118.7      |
| C27—C28—C30        | 120.1 (13) | N2—C31—C35    | 106.4 (11) |
| C15—C13—H13        | 108.7      | N2—C31—C39    | 108.3 (10) |
| C15—C13—C14        | 110.3 (12) | N2—C31—C40    | 114.9 (11) |
| C12—C13—C15        | 110.2 (12) | C35—C31—C39   | 109.0 (11) |

|               |            |               |            |
|---------------|------------|---------------|------------|
| C12—C13—H13   | 108.7      | C35—C31—C40   | 107.9 (12) |
| C12—C13—C14   | 110.3 (12) | C39—C31—C40   | 110.1 (11) |
| C14—C13—H13   | 108.7      | C13—C14—C16   | 109.3 (13) |
| H17A—C17—H17B | 108.2      | C13—C14—H14A  | 109.8      |
| C18—C17—H17A  | 109.7      | C13—C14—H14B  | 109.8      |
| C18—C17—H17B  | 109.7      | C16—C14—H14A  | 109.8      |
| C16—C17—H17A  | 109.7      | C16—C14—H14B  | 109.8      |
| C16—C17—H17B  | 109.7      | H14A—C14—H14B | 108.3      |
| C16—C17—C18   | 109.8 (13) | C31—C35—H35A  | 109.6      |
| C5—C6—H6      | 120.8      | C31—C35—H35B  | 109.6      |
| C5—C6—C7      | 118.5 (13) | C31—C35—C36   | 110.3 (13) |
| C7—C6—H6      | 120.8      | H35A—C35—H35B | 108.1      |
| C20—C18—C15   | 109.5 (12) | C36—C35—H35A  | 109.6      |
| C20—C18—C17   | 110.2 (12) | C36—C35—H35B  | 109.6      |
| C20—C18—H18   | 109.3      | C24—C23—H23A  | 109.0      |
| C15—C18—H18   | 109.3      | C24—C23—H23B  | 109.0      |
| C17—C18—C15   | 109.2 (12) | H23A—C23—H23B | 107.8      |
| C17—C18—H18   | 109.3      | C22—C23—C24   | 112.9 (13) |
| C29—C24—C23   | 119.6 (12) | C22—C23—H23A  | 109.0      |
| C25—C24—C29   | 119.3 (12) | C22—C23—H23B  | 109.0      |
| C25—C24—C23   | 121.0 (13) | C34—C38—C37   | 109.5 (12) |
| C4—C5—H5      | 118.5      | C34—C38—H38   | 109.3      |
| C6—C5—C4      | 122.9 (13) | C37—C38—H38   | 109.3      |
| C6—C5—H5      | 118.5      | C39—C38—C34   | 109.5 (12) |
| C17—C16—H16   | 110.3      | C39—C38—C37   | 109.8 (12) |
| C17—C16—C19   | 108.5 (13) | C39—C38—H38   | 109.3      |
| C17—C16—C14   | 108.5 (13) | C31—C39—H39A  | 109.9      |
| C19—C16—H16   | 110.3      | C31—C39—H39B  | 109.9      |
| C19—C16—C14   | 108.9 (12) | C38—C39—C31   | 109.0 (11) |
| C14—C16—H16   | 110.3      | C38—C39—H39A  | 109.9      |
| C24—C25—H25   | 119.1      | C38—C39—H39B  | 109.9      |
| C24—C25—C26   | 121.7 (14) | H39A—C39—H39B | 108.3      |
| C26—C25—H25   | 119.1      | C34—C32—H32   | 109.5      |
| C13—C12—H12A  | 109.6      | C33—C32—C34   | 108.9 (12) |
| C13—C12—H12B  | 109.6      | C33—C32—H32   | 109.5      |
| C13—C12—C11   | 110.3 (11) | C40—C32—C34   | 109.4 (12) |
| H12A—C12—H12B | 108.1      | C40—C32—C33   | 110.2 (13) |
| C11—C12—H12A  | 109.6      | C40—C32—H32   | 109.5      |

|                 |             |                 |            |
|-----------------|-------------|-----------------|------------|
| C11—C12—H12B    | 109.6       | C31—C40—H40A    | 109.5      |
| C8—C7—C6        | 118.9 (14)  | C31—C40—H40B    | 109.5      |
| C8—C7—H7        | 120.5       | C32—C40—C31     | 110.6 (12) |
| C6—C7—H7        | 120.5       | C32—C40—H40A    | 109.5      |
| N1—C11—C20      | 109.9 (10)  | C32—C40—H40B    | 109.5      |
| N1—C11—C12      | 115.3 (10)  | H40A—C40—H40B   | 108.1      |
| N1—C11—C19      | 107.4 (11)  | C37—C36—C33     | 109.8 (12) |
| C20—C11—C12     | 107.5 (11)  | C37—C36—C35     | 108.0 (12) |
| C19—C11—C20     | 109.0 (11)  | C37—C36—H36     | 110.0      |
| C19—C11—C12     | 107.5 (11)  | C33—C36—C35     | 109.1 (13) |
| C4—C3—H3A       | 108.8       | C33—C36—H36     | 110.0      |
| C4—C3—H3B       | 108.8       | C35—C36—H36     | 110.0      |
| H3A—C3—H3B      | 107.7       | C23—C22—H22     | 115.5      |
| C2—C3—C4        | 113.7 (12)  | C21—C22—C23     | 128.9 (18) |
| C2—C3—H3A       | 108.8       | C21—C22—H22     | 115.5      |
| C2—C3—H3B       | 108.8       | C2—C1—H1A       | 120.0      |
| C16—C19—H19A    | 109.2       | C2—C1—H1B       | 120.0      |
| C16—C19—H19B    | 109.2       | H1A—C1—H1B      | 120.0      |
| C11—C19—C16     | 111.9 (12)  | C22—C21—H21A    | 120.0      |
| C11—C19—H19A    | 109.2       | C22—C21—H21B    | 120.0      |
| C11—C19—H19B    | 109.2       | H21A—C21—H21B   | 120.0      |
| <b>Torsions</b> |             |                 |            |
| O1—C9—C8—C10    | 5 (2)       | C5—C4—C3—C2     | 25 (2)     |
| O1—C9—C8—C7     | -176.2 (13) | C5—C6—C7—C8     | -4 (2)     |
| O2—C29—C28—C27  | 178.5 (14)  | C16—C17—C18—C20 | -59.9 (17) |
| O2—C29—C28—C30  | -5.1 (19)   | C16—C17—C18—C15 | 60.5 (16)  |
| O2—C29—C24—C25  | -178.2 (12) | C25—C24—C23—C22 | -28 (2)    |
| O2—C29—C24—C23  | -0.5 (19)   | C25—C26—C27—C28 | 2 (2)      |
| N1—C11—C19—C16  | 177.1 (11)  | C12—C13—C14—C16 | 60.8 (16)  |
| N2—C31—C35—C36  | -177.1 (11) | C12—C11—C19—C16 | -58.2 (15) |
| N2—C31—C39—C38  | 175.2 (10)  | C7—C8—C10—N1    | 179.8 (14) |
| N2—C31—C40—C32  | -178.8 (11) | C7—C6—C5—C4     | 7 (2)      |
| C29—C28—C27—C26 | 0 (2)       | C11—N1—C10—C8   | 178.4 (12) |
| C29—C28—C30—N2  | 4.2 (19)    | C11—C20—C18—C15 | -60.8 (15) |
| C29—C24—C25—C26 | 0 (2)       | C11—C20—C18—C17 | 59.3 (16)  |
| C29—C24—C23—C22 | 154.5 (14)  | C3—C4—C9—O1     | -4.0 (19)  |
| C4—C9—C8—C10    | -177.0 (13) | C3—C4—C9—C8     | 177.9 (13) |

|                 |             |                 |             |
|-----------------|-------------|-----------------|-------------|
| C4—C9—C8—C7     | 2 (2)       | C3—C4—C5—C6     | 177.7 (14)  |
| C4—C3—C2—C1     | -117 (2)    | C19—C16—C14—C13 | -58.4 (16)  |
| C9—C4—C5—C6     | -5 (2)      | C34—C38—C39—C31 | 59.8 (14)   |
| C9—C4—C3—C2     | -152.1 (13) | C34—C32—C40—C31 | -59.0 (15)  |
| C9—C8—C10—N1    | -1 (2)      | C37—C38—C39—C31 | -60.4 (15)  |
| C9—C8—C7—C6     | 0 (2)       | C27—C28—C30—N2  | -179.4 (14) |
| C20—C11—C19—C16 | 58.0 (15)   | C33—C32—C40—C31 | 60.7 (16)   |
| C15—C13—C12—C11 | 60.8 (14)   | C30—N2—C31—C35  | -122.3 (14) |
| C15—C13—C14—C16 | -61.1 (15)  | C30—N2—C31—C39  | 120.6 (13)  |
| C10—N1—C11—C20  | -112.0 (14) | C30—N2—C31—C40  | -3.0 (18)   |
| C10—N1—C11—C12  | 9.7 (18)    | C30—C28—C27—C26 | -176.9 (14) |
| C10—N1—C11—C19  | 129.5 (14)  | C31—N2—C30—C28  | 179.8 (12)  |
| C10—C8—C7—C6    | 178.5 (13)  | C31—C35—C36—C37 | 61.0 (16)   |
| C28—C29—C24—C25 | 2 (2)       | C31—C35—C36—C33 | -58.4 (16)  |
| C28—C29—C24—C23 | 179.5 (12)  | C14—C13—C12—C11 | -61.2 (16)  |
| C13—C15—C18—C20 | 60.5 (15)   | C14—C16—C19—C11 | 59.3 (16)   |
| C13—C15—C18—C17 | -60.3 (15)  | C35—C31—C39—C38 | 59.9 (14)   |
| C13—C12—C11—N1  | 178.6 (11)  | C35—C31—C40—C32 | -60.4 (16)  |
| C13—C12—C11—C20 | -58.4 (14)  | C23—C24—C25—C26 | -177.8 (14) |
| C13—C12—C11—C19 | 58.8 (15)   | C38—C34—C32—C33 | -60.2 (16)  |
| C17—C16—C19—C11 | -58.7 (16)  | C38—C34—C32—C40 | 60.3 (15)   |
| C17—C16—C14—C13 | 59.6 (16)   | C38—C37—C36—C33 | 58.6 (16)   |
| C18—C20—C11—N1  | -175.2 (11) | C38—C37—C36—C35 | -60.3 (15)  |
| C18—C20—C11—C12 | 58.5 (13)   | C39—C31—C35—C36 | -60.5 (15)  |
| C18—C20—C11—C19 | -57.7 (14)  | C39—C31—C40—C32 | 58.5 (15)   |
| C18—C15—C13—C12 | -60.9 (14)  | C32—C34—C38—C37 | 59.4 (16)   |
| C18—C15—C13—C14 | 61.1 (15)   | C32—C34—C38—C39 | -61.1 (15)  |
| C18—C17—C16—C19 | 58.3 (16)   | C32—C33—C36—C37 | -60.7 (16)  |
| C18—C17—C16—C14 | -59.8 (16)  | C32—C33—C36—C35 | 57.5 (16)   |
| C24—C29—C28—C27 | -2 (2)      | C40—C31—C35—C36 | 59.1 (16)   |
| C24—C29—C28—C30 | 174.9 (12)  | C40—C31—C39—C38 | -58.3 (14)  |
| C24—C25—C26—C27 | -2 (2)      | C36—C37—C38—C34 | -58.6 (15)  |
| C24—C23—C22—C21 | 118.6 (19)  | C36—C37—C38—C39 | 61.6 (16)   |
| C5—C4—C9—O1     | 179.0 (12)  | C36—C33—C32—C34 | 60.7 (16)   |
| C5—C4—C9—C8     | 1 (2)       | C36—C33—C32—C40 | -59.3 (16)  |

Table S3. Bond distances and angles for Zn-Complex

| Bond Lengths |           |          |            |
|--------------|-----------|----------|------------|
| Zn1—O2       | 1.925 (4) | C12—H12B | 0.9900     |
| Zn1—O1       | 1.917 (4) | C12—C13  | 1.546 (9)  |
| Zn1—N1       | 1.994 (5) | C32—H32A | 0.9900     |
| Zn1—N2       | 2.000 (5) | C32—H32B | 0.9900     |
| O2—C29       | 1.300 (7) | C32—C33  | 1.546 (9)  |
| O1—C9        | 1.307 (7) | C6—H6    | 0.9500     |
| N1—C31       | 1.490 (7) | C33—H33  | 1.0000     |
| N1—C30       | 1.294 (7) | C33—C34  | 1.539 (8)  |
| N2—C10       | 1.287 (7) | C33—C39  | 1.527 (9)  |
| N2—C11       | 1.501 (8) | C34—H34A | 0.9900     |
| C8—C10       | 1.482 (8) | C34—H34B | 0.9900     |
| C8—C7        | 1.421 (8) | C40—H40A | 0.9900     |
| C8—C9        | 1.406 (8) | C40—H40B | 0.9900     |
| C31—C36      | 1.537 (8) | C40—C38  | 1.513 (9)  |
| C31—C37      | 1.515 (8) | C25—H25  | 0.9500     |
| C31—C32      | 1.540 (8) | C25—C26  | 1.406 (10) |
| C30—H30      | 0.9500    | C2—H2    | 0.9500     |
| C30—C28      | 1.469 (8) | C2—C1    | 1.311 (10) |
| C10—H10      | 0.9500    | C38—H38  | 1.0000     |
| C28—C29      | 1.420 (9) | C38—C39  | 1.532 (10) |
| C28—C27      | 1.415 (8) | C39—H39A | 0.9900     |
| C29—C24      | 1.422 (9) | C39—H39B | 0.9900     |
| C4—C9        | 1.425 (9) | C19—H19A | 0.9900     |
| C4—C5        | 1.383 (9) | C19—H19B | 0.9900     |
| C4—C3        | 1.509 (9) | C19—C18  | 1.531 (10) |
| C7—H7        | 0.9500    | C19—C13  | 1.532 (9)  |
| C7—C6        | 1.346 (9) | C23—H23  | 0.9500     |
| C11—C20      | 1.526 (8) | C23—C22  | 1.422 (13) |
| C11—C12      | 1.523 (9) | C26—H26  | 0.9500     |
| C11—C16      | 1.529 (9) | C18—H18  | 1.0000     |
| C35—H35      | 1.0000    | C18—C17  | 1.538 (10) |
| C35—C36      | 1.523 (9) | O3—H3C   | 0.8702     |
| C35—C34      | 1.522 (9) | O3—H3D   | 0.8698     |
| C35—C40      | 1.549 (9) | C1—H1A   | 0.96 (9)   |
| C5—H5        | 0.9500    | C1—H1B   | 1.11 (8)   |
| C5—C6        | 1.390 (9) | C16—H16A | 0.9900     |

|             |             |               |            |
|-------------|-------------|---------------|------------|
| C20—H20A    | 0.9900      | C16—H16B      | 0.9900     |
| C20—H20B    | 0.9900      | C16—C15       | 1.540 (10) |
| C20—C18     | 1.542 (9)   | C13—H13       | 1.0000     |
| C36—H36A    | 0.9900      | C13—C14       | 1.508 (11) |
| C36—H36B    | 0.9900      | C15—H15       | 1.0000     |
| C3—H3A      | 0.9900      | C15—C17       | 1.543 (12) |
| C3—H3B      | 0.9900      | C15—C14       | 1.528 (12) |
| C3—C2       | 1.514 (9)   | C17—H17A      | 0.9900     |
| C37—H37A    | 0.9900      | C17—H17B      | 0.9900     |
| C37—H37B    | 0.9900      | C14—H14A      | 0.9900     |
| C37—C38     | 1.545 (9)   | C14—H14B      | 0.9900     |
| C27—H27     | 0.9500      | C21—H21A      | 0.9500     |
| C27—C26     | 1.372 (9)   | C21—H21B      | 0.9500     |
| C24—C25     | 1.375 (9)   | C21—C22       | 1.196 (13) |
| C24—C23     | 1.515 (9)   | C22—H22       | 0.9500     |
| C12—H12A    | 0.9900      |               |            |
| Bond angles |             |               |            |
| O2—Zn1—N1   | 97.22 (19)  | C33—C32—H32A  | 109.7      |
| O2—Zn1—N2   | 111.1 (2)   | C33—C32—H32B  | 109.7      |
| O1—Zn1—O2   | 114.47 (18) | C7—C6—C5      | 119.4 (6)  |
| O1—Zn1—N1   | 114.24 (19) | C7—C6—H6      | 120.3      |
| O1—Zn1—N2   | 97.48 (18)  | C5—C6—H6      | 120.3      |
| N1—Zn1—N2   | 123.3 (2)   | C32—C33—H33   | 109.6      |
| C29—O2—Zn1  | 125.4 (4)   | C34—C33—C32   | 109.0 (5)  |
| C9—O1—Zn1   | 121.9 (4)   | C34—C33—H33   | 109.6      |
| C31—N1—Zn1  | 120.6 (4)   | C39—C33—C32   | 108.5 (5)  |
| C30—N1—Zn1  | 120.0 (4)   | C39—C33—H33   | 109.6      |
| C30—N1—C31  | 119.4 (5)   | C39—C33—C34   | 110.5 (5)  |
| C10—N2—Zn1  | 119.3 (4)   | C35—C34—C33   | 109.8 (5)  |
| C10—N2—C11  | 119.6 (5)   | C35—C34—H34A  | 109.7      |
| C11—N2—Zn1  | 120.9 (4)   | C35—C34—H34B  | 109.7      |
| C7—C8—C10   | 114.5 (5)   | C33—C34—H34A  | 109.7      |
| C9—C8—C10   | 125.8 (5)   | C33—C34—H34B  | 109.7      |
| C9—C8—C7    | 119.7 (5)   | H34A—C34—H34B | 108.2      |
| N1—C31—C36  | 107.2 (5)   | C35—C40—H40A  | 109.7      |
| N1—C31—C37  | 115.5 (5)   | C35—C40—H40B  | 109.7      |
| N1—C31—C32  | 107.0 (4)   | H40A—C40—H40B | 108.2      |
| C36—C31—C32 | 108.6 (5)   | C38—C40—C35   | 109.8 (5)  |

|             |           |               |           |
|-------------|-----------|---------------|-----------|
| C37—C31—C36 | 109.3 (5) | C38—C40—H40A  | 109.7     |
| C37—C31—C32 | 109.0 (5) | C38—C40—H40B  | 109.7     |
| N1—C30—H30  | 116.6     | C24—C25—H25   | 119.5     |
| N1—C30—C28  | 126.7 (6) | C24—C25—C26   | 120.9 (6) |
| C28—C30—H30 | 116.6     | C26—C25—H25   | 119.5     |
| N2—C10—C8   | 125.9 (5) | C3—C2—H2      | 118.0     |
| N2—C10—H10  | 117.0     | C1—C2—C3      | 124.1 (7) |
| C8—C10—H10  | 117.0     | C1—C2—H2      | 118.0     |
| C29—C28—C30 | 126.4 (5) | C37—C38—H38   | 109.3     |
| C27—C28—C30 | 115.2 (6) | C40—C38—C37   | 110.2 (6) |
| C27—C28—C29 | 118.4 (6) | C40—C38—H38   | 109.3     |
| O2—C29—C28  | 122.7 (6) | C40—C38—C39   | 109.8 (5) |
| O2—C29—C24  | 118.6 (6) | C39—C38—C37   | 108.8 (6) |
| C28—C29—C24 | 118.7 (6) | C39—C38—H38   | 109.3     |
| C9—C4—C3    | 119.1 (6) | C33—C39—C38   | 109.5 (5) |
| C5—C4—C9    | 119.6 (6) | C33—C39—H39A  | 109.8     |
| C5—C4—C3    | 121.3 (6) | C33—C39—H39B  | 109.8     |
| C8—C7—H7    | 119.3     | C38—C39—H39A  | 109.8     |
| C6—C7—C8    | 121.4 (6) | C38—C39—H39B  | 109.8     |
| C6—C7—H7    | 119.3     | H39A—C39—H39B | 108.2     |
| N2—C11—C20  | 107.8 (5) | H19A—C19—H19B | 108.3     |
| N2—C11—C12  | 114.7 (5) | C18—C19—H19A  | 109.9     |
| N2—C11—C16  | 105.6 (5) | C18—C19—H19B  | 109.9     |
| C20—C11—C16 | 109.5 (6) | C18—C19—C13   | 109.1 (6) |
| C12—C11—C20 | 109.2 (5) | C13—C19—H19A  | 109.9     |
| C12—C11—C16 | 109.9 (6) | C13—C19—H19B  | 109.9     |
| C36—C35—H35 | 109.9     | C24—C23—H23   | 121.3     |
| C36—C35—C40 | 108.7 (5) | C22—C23—C24   | 117.4 (7) |
| C34—C35—H35 | 109.9     | C22—C23—H23   | 121.3     |
| C34—C35—C36 | 109.2 (5) | C27—C26—C25   | 118.9 (6) |
| C34—C35—C40 | 109.2 (5) | C27—C26—H26   | 120.5     |
| C40—C35—H35 | 109.9     | C25—C26—H26   | 120.5     |
| O1—C9—C8    | 124.3 (5) | C20—C18—H18   | 109.7     |
| O1—C9—C4    | 117.6 (5) | C19—C18—C20   | 108.8 (5) |
| C8—C9—C4    | 118.1 (5) | C19—C18—H18   | 109.7     |
| C4—C5—H5    | 119.1     | C19—C18—C17   | 109.7 (6) |
| C4—C5—C6    | 121.8 (6) | C17—C18—C20   | 109.3 (5) |
| C6—C5—H5    | 119.1     | C17—C18—H18   | 109.7     |



|               |           |               |           |
|---------------|-----------|---------------|-----------|
| C11—C20—H20A  | 109.7     | H3C—O3—H3D    | 104.5     |
| C11—C20—H20B  | 109.7     | C2—C1—H1A     | 121 (5)   |
| C11—C20—C18   | 109.9 (5) | C2—C1—H1B     | 126 (4)   |
| H20A—C20—H20B | 108.2     | H1A—C1—H1B    | 110 (6)   |
| C18—C20—H20A  | 109.7     | C11—C16—H16A  | 109.7     |
| C18—C20—H20B  | 109.7     | C11—C16—H16B  | 109.7     |
| C31—C36—H36A  | 109.4     | C11—C16—C15   | 109.8 (6) |
| C31—C36—H36B  | 109.4     | H16A—C16—H16B | 108.2     |
| C35—C36—C31   | 111.0 (5) | C15—C16—H16A  | 109.7     |
| C35—C36—H36A  | 109.4     | C15—C16—H16B  | 109.7     |
| C35—C36—H36B  | 109.4     | C12—C13—H13   | 109.1     |
| H36A—C36—H36B | 108.0     | C19—C13—C12   | 109.7 (5) |
| C4—C3—H3A     | 109.1     | C19—C13—H13   | 109.1     |
| C4—C3—H3B     | 109.1     | C14—C13—C12   | 110.0 (6) |
| C4—C3—C2      | 112.5 (5) | C14—C13—C19   | 110.0 (7) |
| H3A—C3—H3B    | 107.8     | C14—C13—H13   | 109.1     |
| C2—C3—H3A     | 109.1     | C16—C15—H15   | 109.7     |
| C2—C3—H3B     | 109.1     | C16—C15—C17   | 108.0 (6) |
| C31—C37—H37A  | 109.7     | C17—C15—H15   | 109.7     |
| C31—C37—H37B  | 109.7     | C14—C15—C16   | 109.9 (7) |
| C31—C37—C38   | 109.8 (5) | C14—C15—H15   | 109.7     |
| H37A—C37—H37B | 108.2     | C14—C15—C17   | 109.6 (6) |
| C38—C37—H37A  | 109.7     | C18—C17—C15   | 109.4 (6) |
| C38—C37—H37B  | 109.7     | C18—C17—H17A  | 109.8     |
| C28—C27—H27   | 118.9     | C18—C17—H17B  | 109.8     |
| C26—C27—C28   | 122.2 (6) | C15—C17—H17A  | 109.8     |
| C26—C27—H27   | 118.9     | C15—C17—H17B  | 109.8     |
| C29—C24—C23   | 117.9 (6) | H17A—C17—H17B | 108.2     |
| C25—C24—C29   | 120.7 (6) | C13—C14—C15   | 109.8 (6) |
| C25—C24—C23   | 121.4 (6) | C13—C14—H14A  | 109.7     |
| C11—C12—H12A  | 109.9     | C13—C14—H14B  | 109.7     |
| C11—C12—H12B  | 109.9     | C15—C14—H14A  | 109.7     |
| C11—C12—C13   | 108.9 (6) | C15—C14—H14B  | 109.7     |
| H12A—C12—H12B | 108.3     | H14A—C14—H14B | 108.2     |
| C13—C12—H12A  | 109.9     | H21A—C21—H21B | 120.0     |
| C13—C12—H12B  | 109.9     | C22—C21—H21A  | 120.0     |
| C31—C32—H32A  | 109.7     | C22—C21—H21B  | 120.0     |
| C31—C32—H32B  | 109.7     | C23—C22—H22   | 107.8     |

|                 |            |                 |             |
|-----------------|------------|-----------------|-------------|
| C31—C32—C33     | 109.8 (5)  | C21—C22—C23     | 144.4 (17)  |
| H32A—C32—H32B   | 108.2      | C21—C22—H22     | 107.8       |
| Torsion angles  |            |                 |             |
| Zn1—O2—C29—C28  | -12.8 (8)  | C11—C16—C15—C17 | -61.5 (9)   |
| Zn1—O2—C29—C24  | 166.8 (4)  | C11—C16—C15—C14 | 58.1 (8)    |
| Zn1—O1—C9—C8    | -20.0 (8)  | C35—C40—C38—C37 | -59.4 (7)   |
| Zn1—O1—C9—C4    | 159.3 (4)  | C35—C40—C38—C39 | 60.5 (7)    |
| Zn1—N1—C31—C36  | 42.7 (6)   | C9—C8—C10—N2    | 10.0 (10)   |
| Zn1—N1—C31—C37  | 164.8 (4)  | C9—C8—C7—C6     | -0.5 (9)    |
| Zn1—N1—C31—C32  | -73.7 (5)  | C9—C4—C5—C6     | 1.6 (9)     |
| Zn1—N1—C30—C28  | 0.1 (8)    | C9—C4—C3—C2     | 91.9 (7)    |
| Zn1—N2—C10—C8   | 2.5 (8)    | C5—C4—C9—O1     | 177.8 (5)   |
| Zn1—N2—C11—C20  | 35.8 (6)   | C5—C4—C9—C8     | -2.8 (9)    |
| Zn1—N2—C11—C12  | 157.7 (4)  | C5—C4—C3—C2     | -88.6 (7)   |
| Zn1—N2—C11—C16  | -81.1 (6)  | C20—C11—C12—C13 | -60.3 (7)   |
| O2—C29—C24—C25  | 178.8 (6)  | C20—C11—C16—C15 | 60.9 (8)    |
| O2—C29—C24—C23  | -0.4 (9)   | C20—C18—C17—C15 | -60.3 (8)   |
| N1—C31—C36—C35  | -174.5 (5) | C36—C31—C37—C38 | -58.4 (7)   |
| N1—C31—C37—C38  | -179.4 (5) | C36—C31—C32—C33 | 58.8 (6)    |
| N1—C31—C32—C33  | 174.3 (5)  | C36—C35—C34—C33 | -60.2 (7)   |
| N1—C30—C28—C29  | 5.5 (10)   | C36—C35—C40—C38 | 58.9 (7)    |
| N1—C30—C28—C27  | -176.1 (6) | C3—C4—C9—O1     | -2.7 (8)    |
| N2—C11—C20—C18  | -173.7 (5) | C3—C4—C9—C8     | 176.6 (5)   |
| N2—C11—C12—C13  | 178.5 (5)  | C3—C4—C5—C6     | -177.8 (6)  |
| N2—C11—C16—C15  | 176.7 (6)  | C37—C31—C36—C35 | 59.6 (7)    |
| C8—C7—C6—C5     | -0.8 (10)  | C37—C31—C32—C33 | -60.2 (7)   |
| C31—N1—C30—C28  | -179.9 (5) | C37—C38—C39—C33 | 61.2 (7)    |
| C31—C37—C38—C40 | 59.6 (7)   | C27—C28—C29—O2  | -176.9 (6)  |
| C31—C37—C38—C39 | -60.8 (7)  | C27—C28—C29—C24 | 3.6 (9)     |
| C31—C32—C33—C34 | -59.9 (7)  | C24—C25—C26—C27 | 3.1 (10)    |
| C31—C32—C33—C39 | 60.4 (7)   | C24—C23—C22—C21 | -117.9 (16) |
| C30—N1—C31—C36  | -137.4 (5) | C12—C11—C20—C18 | 61.0 (7)    |
| C30—N1—C31—C37  | -15.3 (7)  | C12—C11—C16—C15 | -59.1 (8)   |
| C30—N1—C31—C32  | 106.2 (6)  | C12—C13—C14—C15 | 60.1 (8)    |
| C30—C28—C29—O2  | 1.4 (10)   | C32—C31—C36—C35 | -59.2 (6)   |
| C30—C28—C29—C24 | -178.1 (6) | C32—C31—C37—C38 | 60.2 (7)    |
| C30—C28—C27—C26 | 179.3 (6)  | C32—C33—C34—C35 | 60.5 (6)    |
| C10—N2—C11—C20  | -147.6 (6) | C32—C33—C39—C38 | -61.0 (7)   |

|                 |             |                 |           |
|-----------------|-------------|-----------------|-----------|
| C10—N2—C11—C12  | -25.7 (8)   | C34—C35—C36—C31 | 60.0 (7)  |
| C10—N2—C11—C16  | 95.4 (7)    | C34—C35—C40—C38 | -60.2 (7) |
| C10—C8—C7—C6    | -178.8 (6)  | C34—C33—C39—C38 | 58.4 (7)  |
| C10—C8—C9—O1    | -0.3 (9)    | C40—C35—C36—C31 | -59.0 (6) |
| C10—C8—C9—C4    | -179.6 (6)  | C40—C35—C34—C33 | 58.5 (6)  |
| C28—C29—C24—C25 | -1.7 (9)    | C40—C38—C39—C33 | -59.5 (7) |
| C28—C29—C24—C23 | 179.1 (6)   | C25—C24—C23—C22 | 24.0 (13) |
| C28—C27—C26—C25 | -1.1 (10)   | C39—C33—C34—C35 | -58.6 (7) |
| C29—C28—C27—C26 | -2.2 (9)    | C19—C18—C17—C15 | 58.9 (8)  |
| C29—C24—C25—C26 | -1.7 (10)   | C19—C13—C14—C15 | -60.8 (7) |
| C29—C24—C23—C22 | -156.8 (11) | C23—C24—C25—C26 | 177.5 (6) |
| C4—C5—C6—C7     | 0.3 (10)    | C18—C19—C13—C12 | -60.5 (8) |
| C4—C3—C2—C1     | 120.4 (8)   | C18—C19—C13—C14 | 60.6 (7)  |
| C7—C8—C10—N2    | -171.8 (6)  | C16—C11—C20—C18 | -59.3 (7) |
| C7—C8—C9—O1     | -178.4 (6)  | C16—C11—C12—C13 | 59.7 (7)  |
| C7—C8—C9—C4     | 2.3 (8)     | C16—C15—C17—C18 | 61.2 (8)  |
| C11—N2—C10—C8   | -174.1 (5)  | C16—C15—C14—C13 | -58.9 (8) |
| C11—C20—C18—C19 | -60.6 (7)   | C13—C19—C18—C20 | 60.0 (7)  |
| C11—C20—C18—C17 | 59.2 (8)    | C13—C19—C18—C17 | -59.5 (7) |
| C11—C12—C13—C19 | 60.5 (7)    | C17—C15—C14—C13 | 59.7 (8)  |
| C11—C12—C13—C14 | -60.6 (8)   | C14—C15—C17—C18 | -58.6 (8) |
